# Supplementary material for: Synthesis and structures of gallaarsenes LGaAsGa(X)L featuring a Ga–As double bond
Source: Royal Society of Chemistry journal article supplement (doi:10.1039/c9dt03998h), 2019-01-01
Supplement: c9dt03998h1.pdf [file c9dt03998h1.pdf]

## Supporting Information

### Syntheses and Structures of Gallaarsenes LGaAsGa(X)L featuring a Ga–As Double Bond

*Juliane Schoening, Lukas John, Christoph Wölper, Stephan Schulz\**

## Table of Content

### 1. Experimental Part

**Figure S1-S3:**  $^1\text{H}$ ,  $^{13}\text{C}$  NMR and IR spectra of **1**.

**Figure S4:** (Variable-temperature)  $^1\text{H}$  NMR spectra of **1**.

**Figure S5-S7:**  $^1\text{H}$ ,  $^{13}\text{C}$  NMR and IR spectra of **2**.

**Figure S8:** (Variable-temperature)  $^1\text{H}$  NMR spectra of **2**.

**Figure S9:** UV/Vis spectrum of **2**.

### 2. Crystallographic Details

**Table S1.** Crystallographic information for **1** and **2**.

**Table S2, S3.** Bond lengths and angles for **1**.

**Table S4, S5.** Bond lengths and angles for **1**.

### 3. Quantum chemical calculations

**Table S6.** Cartesian coordinates  $x,y,z$  [ $\text{\AA}$ ] for the optimized geometry of LGaAsGa(Cl)L **1**.

**Figure S10.** Calculated structure, HOMO and LUMO of LGaAsGa(Cl)L (**1**).

**Table S7.** NPA atomic charges ( $q$ ,  $e$ ), occupation numbers (ON,  $|e|$ ) of the bonds according to NBO, Mayer bond orders (MBO), bond polarization (P) and bond orbital character (OC) for the central Ga(2)-As-Ga(1)-Cl motive in LGaAsGa(Cl)L (**1**).

## 1. Experimental Part

**Fig. S1.**  $^1\text{H-NMR}$  spectrum of LGaAsGa(Cl)L (**1**) in toluene- $d_8$  at room temperature.

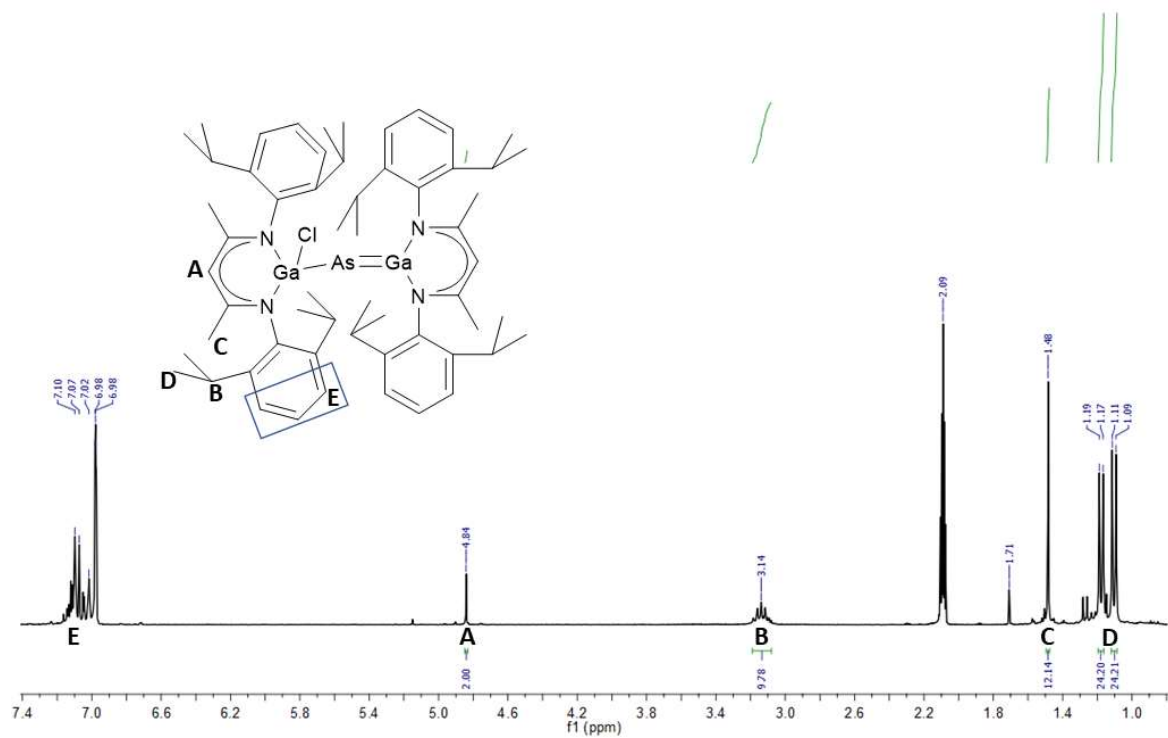

**Fig. S2.**  $^{13}\text{C-NMR}$  spectrum of LGaAsGa(Cl)L (**1**) in toluene- $d_8$  at room temperature.

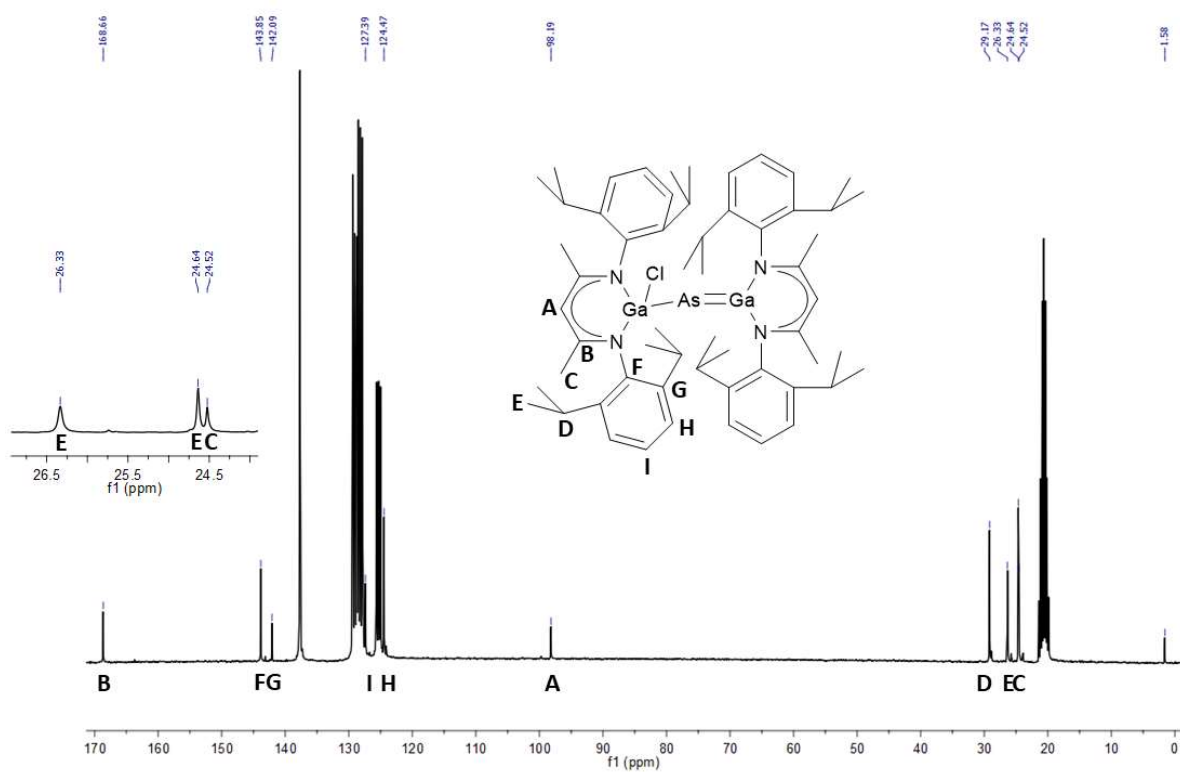

**Fig. S3.** IR spectrum of LGaAsGa(Cl)L (**1**) at room temperature.

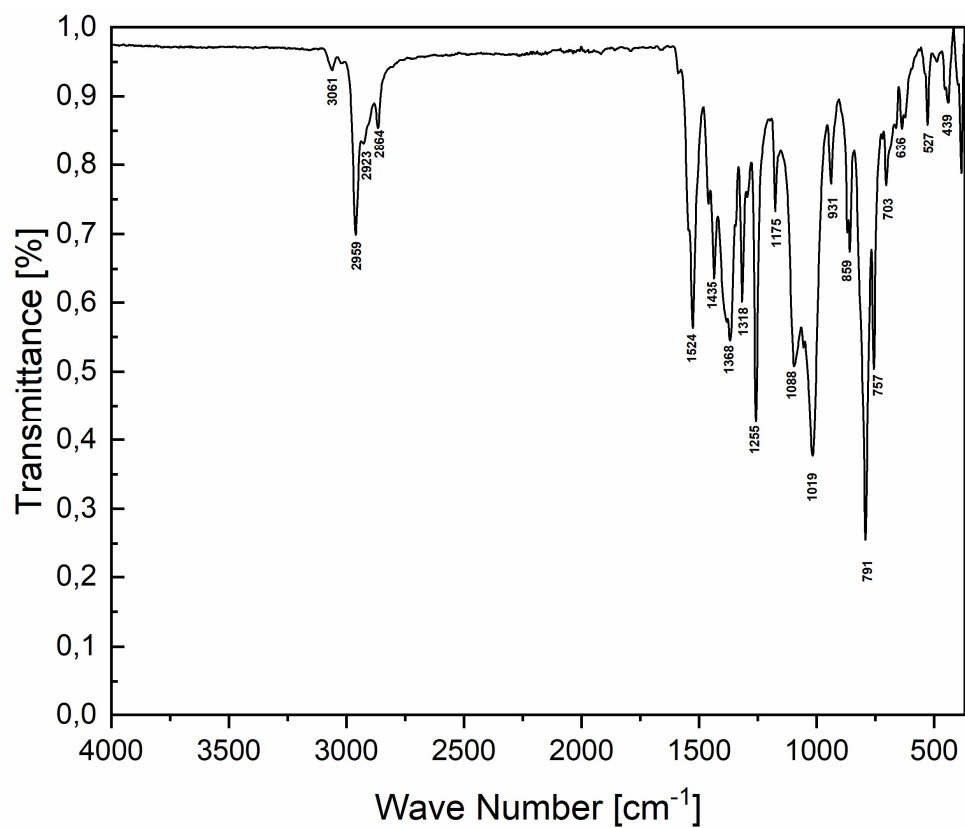

**Figure S4:** (Variable-temperature) <sup>1</sup>H NMR spectra of **1** in toluene-*d*<sub>8</sub>.

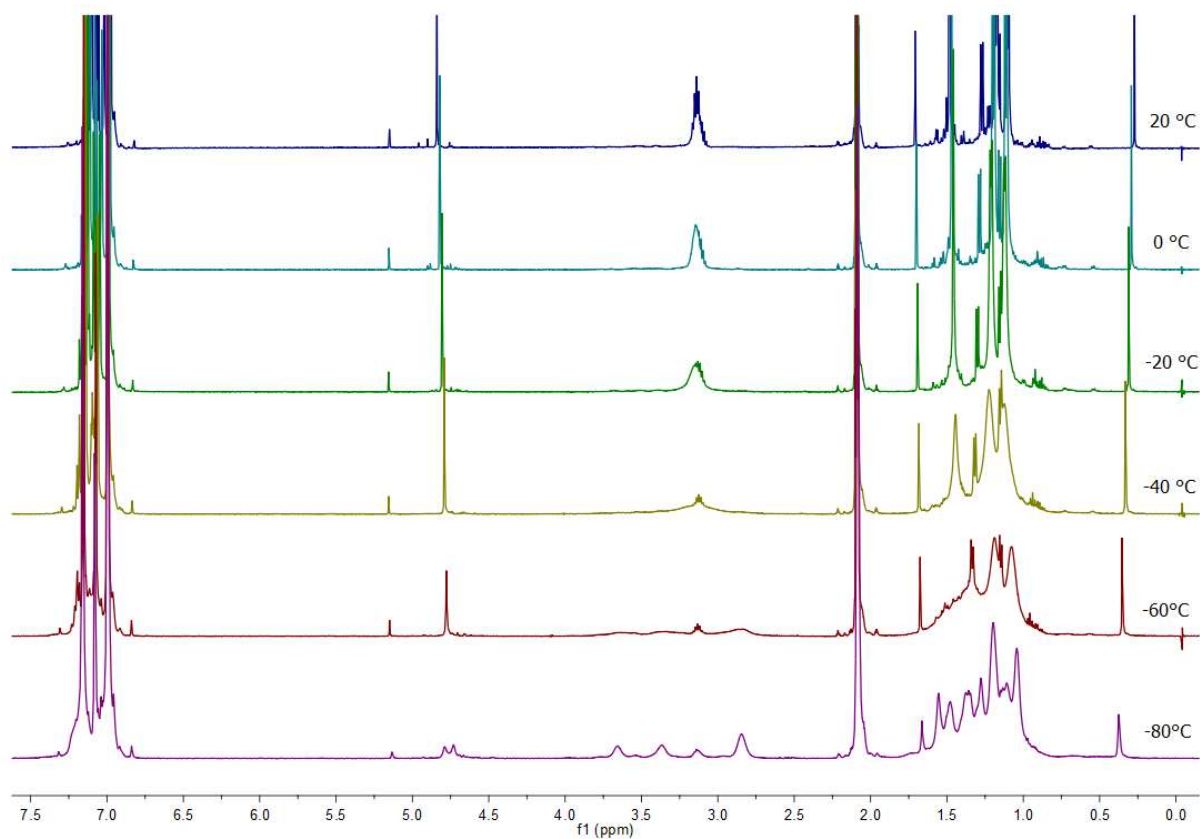

**Fig. S5.**  $^1\text{H-NMR}$  spectrum of LGaAsGa(Br)L (**2**) in benzene- $d_6$  at room temperature.

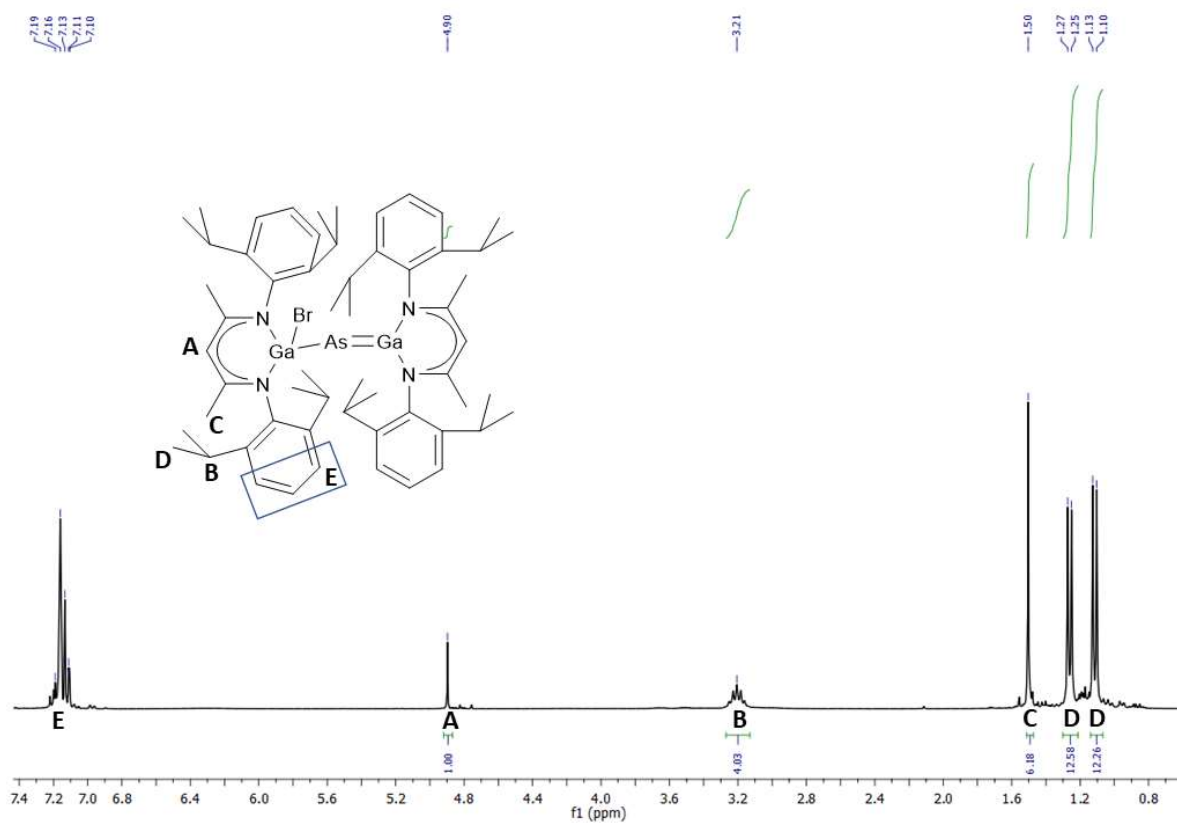

**Fig. S6.**  $^{13}\text{C-NMR}$  spectrum of LGaAsGa(Br)L (**2**) in benzene- $d_6$  at room temperature.

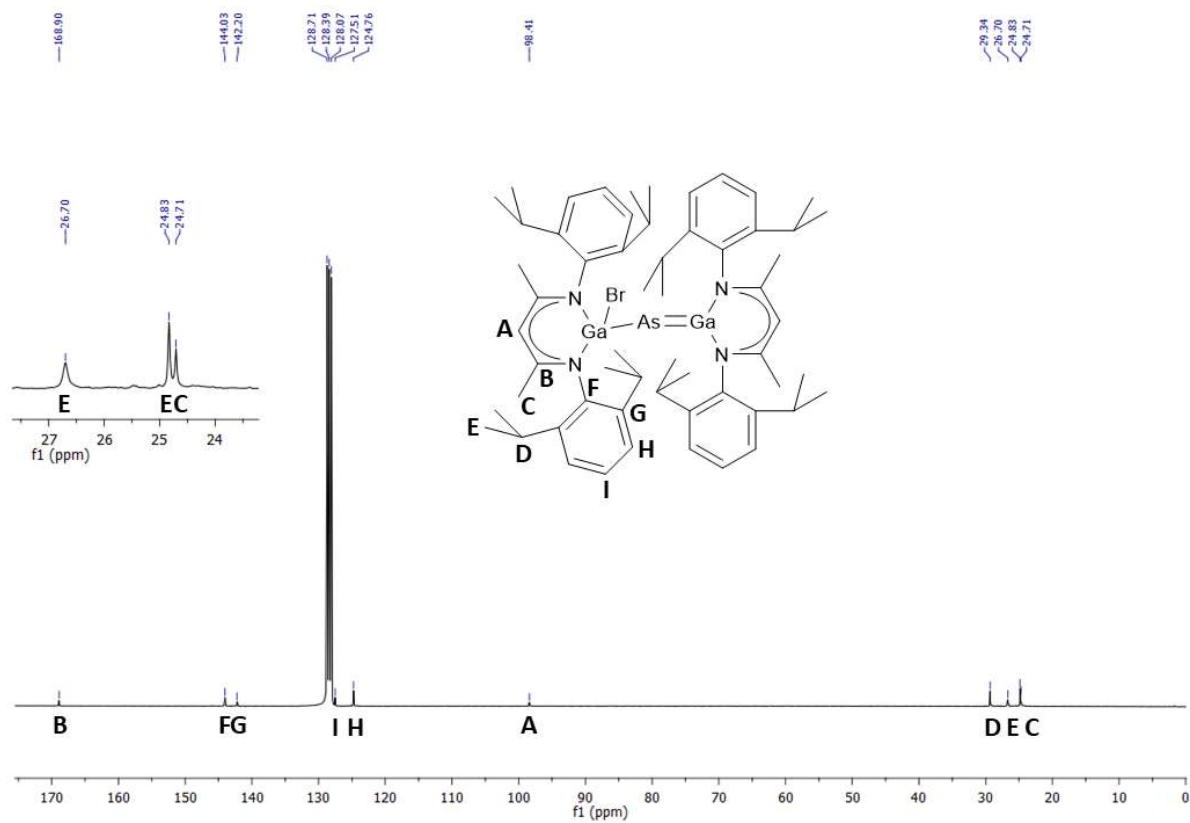

**Figure S7:** IR spectrum of LGaAsGa(Br)L (**2**) at room temperature.

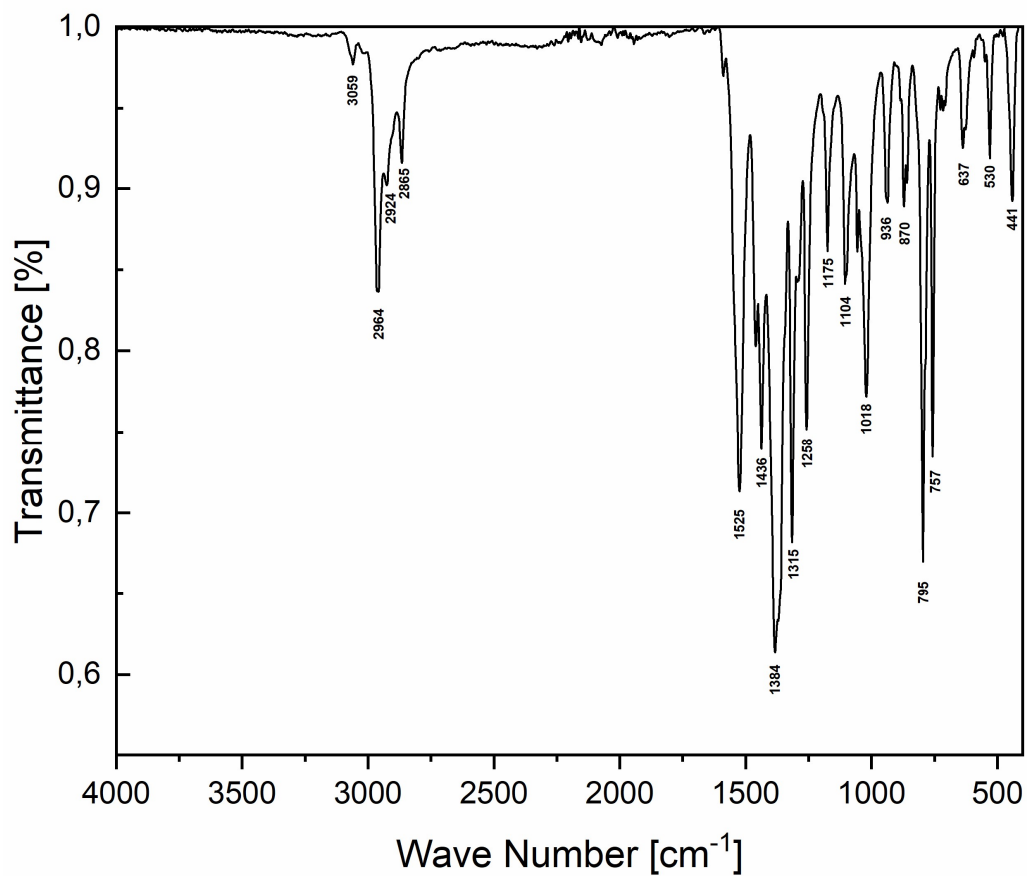

**Figure S8:** (Variable-temperature) <sup>1</sup>H NMR spectra of **2** in toluene-*d*<sub>8</sub>.

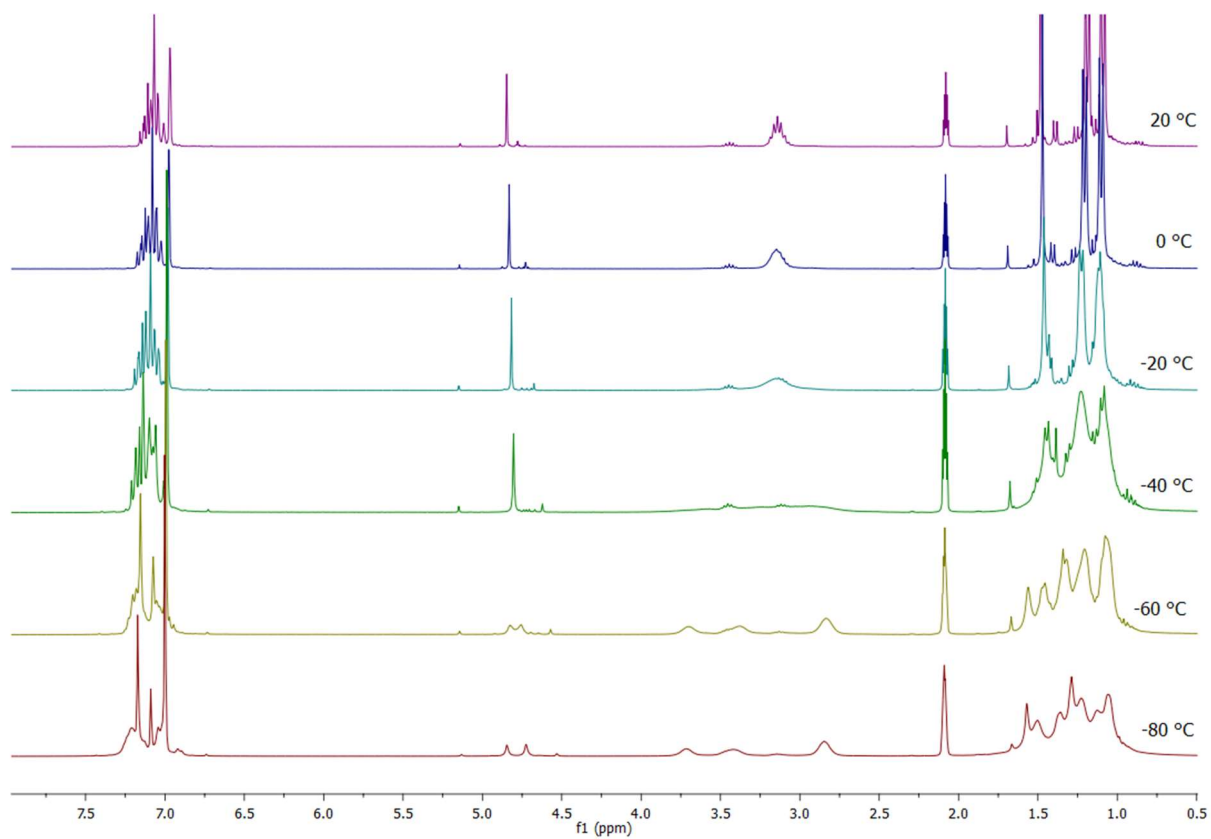

**Figure S9:** UV/Vis spectrum of LGaAsGa(Br)L (**2**) at room temperature in toluene-*d*<sub>8</sub>.

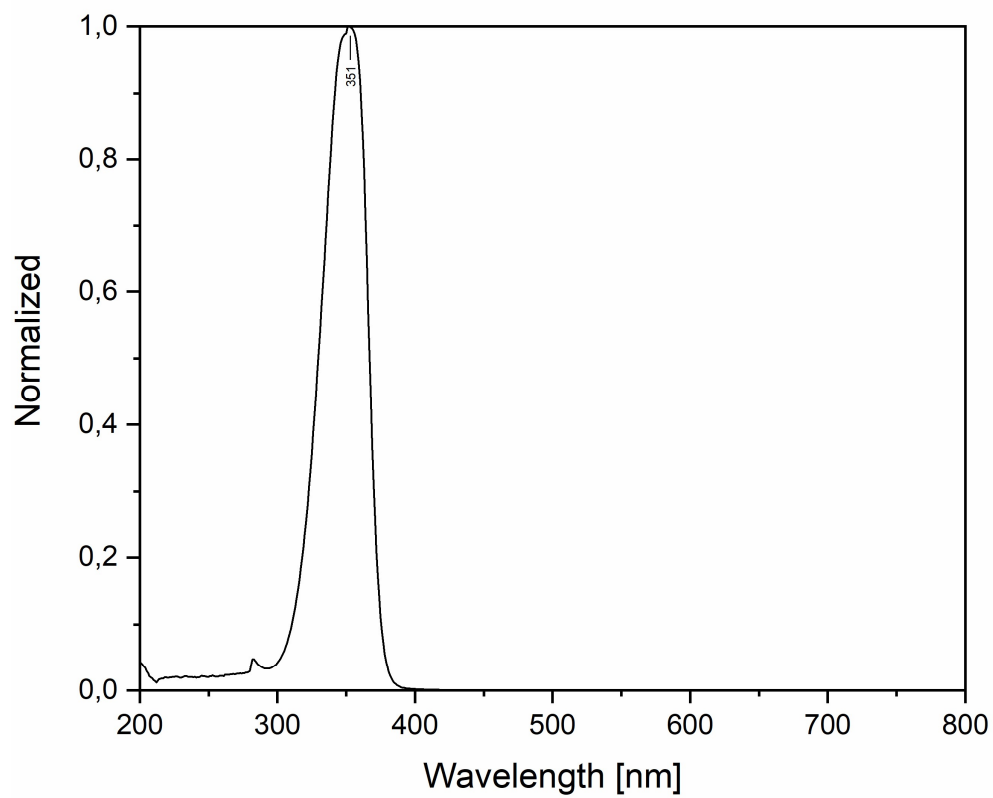

## 2. Crystallographic Details

**Table S1:** Crystal structure data of **1** and **2**.

|                                                  | <b>1</b>                                                           | <b>2</b>                                                           |
|--------------------------------------------------|--------------------------------------------------------------------|--------------------------------------------------------------------|
| Empirical formula                                | C <sub>58</sub> H <sub>82</sub> AsClGa <sub>2</sub> N <sub>4</sub> | C <sub>58</sub> H <sub>82</sub> AsBrGa <sub>2</sub> N <sub>4</sub> |
| Formula weight                                   | 1085.08                                                            | 1129.54                                                            |
| Density (calculated)                             | 1.251 g·cm <sup>-3</sup>                                           | 1.306 g·cm <sup>-3</sup>                                           |
| <i>F</i> (000)                                   | 1140                                                               | 2352                                                               |
| Temperature                                      | 100(2) K                                                           | 100(2) K                                                           |
| Crystal size                                     | 0.280 × 0.162 × 0.112 mm                                           | 0.167 × 0.158 × 0.148 mm                                           |
| Crystal colour                                   | orangish red                                                       | orange                                                             |
| Crystal description                              | tablet                                                             | tablet                                                             |
| Wavelength                                       | 0.71073 Å                                                          | 0.71073 Å                                                          |
| Crystal system                                   | triclinic                                                          | monoclinic                                                         |
| Space group                                      | <i>P</i> -1                                                        | <i>P</i> 21/ <i>n</i>                                              |
| Unit cell dimensions                             |                                                                    |                                                                    |
| <i>a</i> [Å]                                     | 11.9809(3)                                                         | 17.4414(16)                                                        |
| <i>b</i> [Å]                                     | 13.4857(4)                                                         | 16.6936(15)                                                        |
| <i>c</i> [Å]                                     | 20.0846(5)                                                         | 19.7268(19)                                                        |
| $\alpha$ [°]                                     | 80.8110(10)                                                        | 90                                                                 |
| $\beta$ [°]                                      | 85.685(2)                                                          | 90.684(6)                                                          |
| $\gamma$ [°]                                     | 64.0770(10)                                                        | 90                                                                 |
| Volume                                           | 2881.07(14) Å <sup>3</sup>                                         | 5743.2(9) Å <sup>3</sup>                                           |
| <i>Z</i>                                         | 2                                                                  | 4                                                                  |
| Cell measurement reflections used                | 9698                                                               | 9956                                                               |
| Cell measurement $\theta$ min/max                | 2.62°/30.39°                                                       | 2.40°/29.78°                                                       |
| Diffractometer control software                  | BRUKER D8 KAPPA APEX 2 (3.0-2009)                                  | BRUKER APEX2 (v2009.5-1)                                           |
| Diffractometer measurement device                | Bruker D8 KAPPA series II with APEX II area detector system        | Bruker D8 KAPPA II (APEX II detector)                              |
| Diffractometer measurement method                | Data collection strategy APEX 2/COSMO                              | Data collection strategy APEX 2/COSMO                              |
| $\theta$ range for data collection               | 1.696°- 30.709°                                                    | 1.549°- 26.372°                                                    |
| Completeness to $\theta = 25.242^\circ$          | 100.0%                                                             | 99.8%                                                              |
| Completeness to $\theta_{\max} = 30.709^\circ$   | 93.5%                                                              | 99.6%                                                              |
| Index ranges                                     | -16 ≤ <i>h</i> ≤ 17                                                | -21 ≤ <i>h</i> ≤ 21                                                |
|                                                  | -19 ≤ <i>k</i> ≤ 19                                                | -20 ≤ <i>k</i> ≤ 20                                                |
|                                                  | -27 ≤ <i>l</i> ≤ 28                                                | -24 ≤ <i>l</i> ≤ 24                                                |
| Computing data reduction                         | BRUKER D8 KAPPA APEX 2 (3.0-2009)                                  | BRUKER APEX2(v2009.5-1)                                            |
| Absorption coefficient                           | 1.589 mm <sup>-1</sup>                                             | 2.244 mm <sup>-1</sup>                                             |
| Absorption correction                            | Semi-empirical from equivalents                                    | Semi-empirical from equivalents                                    |
| Computation absorption correction                | BRUKER AXS SMART APEX 2 Vers. 3.0-2009                             | SADABS                                                             |
| Max./min. Transmission                           | 0.75/0.64                                                          | 0.75/0.52                                                          |
| <i>R</i> <sub>merg</sub> before/after correction | 0.0529/0.0375                                                      | 0.1096/0.0833                                                      |



|                                   |                                                              |                                                               |
|-----------------------------------|--------------------------------------------------------------|---------------------------------------------------------------|
| Computing structure solution      | BRUKER D8 KAPPA APEX 2 (3.0-2009)                            | BRUKER APEX2(v2009.5-1)                                       |
| Computing structure refinement    | SHELXL-2016/6 (Sheldrick, 2016)                              | SHELXL-2017/1 (Sheldrick, 2017)                               |
| Refinement method                 | Full-matrix least-squares on $F^2$                           | Full-matrix least-squares on $F^2$                            |
| Reflections collected             | 76106                                                        | 76970                                                         |
| Independent reflections           | 16759                                                        | 11704                                                         |
| $R_{\text{int}}$                  | 0.0287                                                       | 0.0881                                                        |
| Reflections with $I > 2\sigma(I)$ | 12469                                                        | 7552                                                          |
| Restraints                        | 100                                                          | 0                                                             |
| Parameter                         | 686                                                          | 615                                                           |
| Goof                              | 1.040                                                        | 1.121                                                         |
| Weighting details                 | $w = 1/[\sigma^2(F_{\text{obs}}^2) + (0.0601P)^2 + 5.2799P]$ | $w = 1/[\sigma^2(F_{\text{obs}}^2) + (0.0887P)^2 + 51.8630P]$ |
|                                   | where $P = (F_{\text{obs}}^2 + 2F_{\text{calc}}^2)/3$        | where $P = (F_{\text{obs}}^2 + 2F_{\text{calc}}^2)/3$         |
| $R_1 [I > 2\sigma(I)]$            | 0.0522                                                       | 0.0787                                                        |
| $wR_2 [I > 2\sigma(I)]$           | 0.1296                                                       | 0.1808                                                        |
| $R_1$ [all data]                  | 0.0770                                                       | 0.1392                                                        |
| $wR_2$ [all data]                 | 0.1423                                                       | 0.2286                                                        |
| Largest diff. peak and hole       | 2.964/-1.184                                                 | 3.140/-0.888                                                  |

**Table S2:** Bond lengths [Å] for **1**.

|               |           |               |           |
|---------------|-----------|---------------|-----------|
| As(1)-Ga(2)   | 2.2628(5) | C(18)-C(19)   | 1.404(5)  |
| As(1)-Ga(1)   | 2.3503(4) | C(19)-C(20)   | 1.395(5)  |
| Cl(1)-Ga(1)   | 2.2783(9) | C(19)-C(24)   | 1.522(6)  |
| As(1')-Ga(2)  | 2.214(3)  | C(20)-C(21)   | 1.380(7)  |
| As(1')-Ga(1)  | 2.448(4)  | C(21)-C(22)   | 1.367(7)  |
| Cl(1')-Ga(2)  | 2.473(7)  | C(22)-C(23)   | 1.397(5)  |
| Ga(1)-N(2)    | 1.977(2)  | C(23)-C(27)   | 1.513(5)  |
| Ga(1)-N(1)    | 1.983(2)  | C(24)-C(25)   | 1.524(6)  |
| Ga(2)-N(3)    | 1.922(3)  | C(24)-C(26)   | 1.544(7)  |
| Ga(2)-N(4)    | 1.957(2)  | C(27)-C(29)   | 1.509(6)  |
| N(1)-C(1)     | 1.328(4)  | C(27)-C(28)   | 1.549(5)  |
| N(1)-C(6)     | 1.446(4)  | C(30)-C(31)   | 1.394(5)  |
| N(2)-C(3)     | 1.335(4)  | C(30)-C(33)   | 1.513(5)  |
| N(2)-C(18)    | 1.448(4)  | C(31)-C(32)   | 1.390(4)  |
| N(3)-C(30)    | 1.337(4)  | C(32)-C(34)   | 1.507(4)  |
| N(3)-C(35)    | 1.444(5)  | C(35)-C(36)   | 1.396(6)  |
| N(3)-C(35')   | 1.60(3)   | C(35)-C(40)   | 1.406(7)  |
| N(4)-C(32)    | 1.333(4)  | C(36)-C(37)   | 1.410(6)  |
| N(4)-C(47)    | 1.442(4)  | C(36)-C(41)   | 1.519(8)  |
| C(1)-C(2)     | 1.400(5)  | C(37)-C(38)   | 1.378(7)  |
| C(1)-C(4)     | 1.500(5)  | C(38)-C(39)   | 1.359(7)  |
| C(2)-C(3)     | 1.388(5)  | C(39)-C(40)   | 1.393(6)  |
| C(3)-C(5)     | 1.516(5)  | C(40)-C(44)   | 1.512(7)  |
| C(6)-C(7)     | 1.403(5)  | C(41)-C(42)   | 1.523(7)  |
| C(6)-C(11)    | 1.408(5)  | C(41)-C(43)   | 1.524(6)  |
| C(7)-C(8)     | 1.403(6)  | C(44)-C(45)   | 1.500(7)  |
| C(7)-C(12)    | 1.520(7)  | C(44)-C(46)   | 1.509(6)  |
| C(8)-C(9)     | 1.384(8)  | C(35')-C(36') | 1.387(14) |
| C(9)-C(10)    | 1.347(8)  | C(35')-C(40') | 1.390(14) |
| C(10)-C(11)   | 1.402(5)  | C(36')-C(37') | 1.394(14) |
| C(11)-C(15)   | 1.491(6)  | C(36')-C(41') | 1.521(17) |
| C(12)-C(13)   | 1.509(6)  | C(37')-C(38') | 1.392(14) |
| C(12)-C(14)   | 1.514(7)  | C(38')-C(39') | 1.389(14) |
| C(15)-C(16)   | 1.521(6)  | C(39')-C(40') | 1.372(14) |
| C(15)-C(17)   | 1.553(5)  | C(40')-C(44') | 1.519(16) |
| C(18)-C(23)   | 1.401(5)  | C(41')-C(43') | 1.515(15) |
| C(41')-C(42') | 1.520(15) | C(50)-C(51)   | 1.379(5)  |
| C(44')-C(45') | 1.509(15) | C(51)-C(52)   | 1.396(4)  |
| C(44')-C(46') | 1.521(14) | C(52)-C(56)   | 1.515(5)  |
| C(47)-C(52)   | 1.406(5)  | C(53)-C(55)   | 1.520(6)  |
| C(47)-C(48)   | 1.406(4)  | C(53)-C(54)   | 1.527(6)  |
| C(48)-C(49)   | 1.399(5)  | C(56)-C(58)   | 1.532(5)  |
| C(48)-C(53)   | 1.517(5)  | C(56)-C(57)   | 1.533(5)  |
| C(49)-C(50)   | 1.380(6)  |               |           |

**Table S3:** Bond angles [°] for **1**.

|                     |             |                      |           |                      |           |
|---------------------|-------------|----------------------|-----------|----------------------|-----------|
| Ga(2)-As(1)-Ga(1)   | 111.419(19) | N(2)-C(3)-C(5)       | 119.3(3)  | C(36)-C(35)-N(3)     | 116.8(4)  |
| Ga(2)-As(1')-Ga(1)  | 109.58(16)  | C(2)-C(3)-C(5)       | 116.5(3)  | C(40)-C(35)-N(3)     | 120.5(4)  |
| N(2)-Ga(1)-N(1)     | 94.04(10)   | C(7)-C(6)-C(11)      | 121.4(3)  | C(35)-C(36)-C(37)    | 116.8(5)  |
| N(2)-Ga(1)-Cl(1)    | 101.70(8)   | C(7)-C(6)-N(1)       | 118.5(3)  | C(35)-C(36)-C(41)    | 122.7(4)  |
| N(1)-Ga(1)-Cl(1)    | 99.55(8)    | C(11)-C(6)-N(1)      | 120.1(3)  | C(37)-C(36)-C(41)    | 120.4(5)  |
| N(2)-Ga(1)-As(1)    | 107.88(7)   | C(8)-C(7)-C(6)       | 117.3(4)  | C(38)-C(37)-C(36)    | 120.5(5)  |
| N(1)-Ga(1)-As(1)    | 117.33(7)   | C(8)-C(7)-C(12)      | 121.9(4)  | C(39)-C(38)-C(37)    | 121.7(5)  |
| Cl(1)-Ga(1)-As(1)   | 129.83(3)   | C(6)-C(7)-C(12)      | 120.6(3)  | C(38)-C(39)-C(40)    | 120.6(5)  |
| N(2)-Ga(1)-As(1')   | 126.97(15)  | C(9)-C(8)-C(7)       | 121.5(5)  | C(39)-C(40)-C(35)    | 117.7(5)  |
| N(1)-Ga(1)-As(1')   | 102.76(13)  | C(10)-C(9)-C(8)      | 120.0(4)  | C(39)-C(40)-C(44)    | 121.2(5)  |
| N(3)-Ga(2)-N(4)     | 95.54(11)   | C(9)-C(10)-C(11)     | 122.0(5)  | C(35)-C(40)-C(44)    | 121.1(4)  |
| N(3)-Ga(2)-As(1')   | 129.89(18)  | C(10)-C(11)-C(6)     | 117.7(4)  | C(36)-C(41)-C(42)    | 112.2(4)  |
| N(4)-Ga(2)-As(1')   | 121.21(12)  | C(10)-C(11)-C(15)    | 118.5(4)  | C(36)-C(41)-C(43)    | 111.8(6)  |
| N(3)-Ga(2)-As(1)    | 150.79(8)   | C(6)-C(11)-C(15)     | 123.8(3)  | C(42)-C(41)-C(43)    | 111.3(5)  |
| N(4)-Ga(2)-As(1)    | 110.96(7)   | C(13)-C(12)-C(14)    | 110.7(4)  | C(45)-C(44)-C(46)    | 110.5(5)  |
| N(3)-Ga(2)-Cl(1')   | 85.1(2)     | C(13)-C(12)-C(7)     | 113.6(4)  | C(45)-C(44)-C(40)    | 111.9(4)  |
| N(4)-Ga(2)-Cl(1')   | 97.40(17)   | C(14)-C(12)-C(7)     | 111.2(4)  | C(46)-C(44)-C(40)    | 115.3(4)  |
| As(1')-Ga(2)-Cl(1') | 118.6(2)    | C(11)-C(15)-C(16)    | 111.0(3)  | C(36')-C(35')-C(40') | 125(2)    |
| C(1)-N(1)-C(6)      | 119.2(2)    | C(11)-C(15)-C(17)    | 111.5(4)  | C(36')-C(35')-N(3)   | 127.5(16) |
| C(1)-N(1)-Ga(1)     | 120.6(2)    | C(16)-C(15)-C(17)    | 108.9(4)  | C(40')-C(35')-N(3)   | 107.1(17) |
| C(6)-N(1)-Ga(1)     | 119.84(18)  | C(23)-C(18)-C(19)    | 121.5(3)  | C(35')-C(36')-C(37') | 116(2)    |
| C(3)-N(2)-C(18)     | 117.1(3)    | C(23)-C(18)-N(2)     | 120.1(3)  | C(43')-C(41')-C(36') | 108(3)    |
| C(3)-N(2)-Ga(1)     | 119.9(2)    | C(19)-C(18)-N(2)     | 118.3(3)  | C(42')-C(41')-C(36') | 114(3)    |
| C(18)-N(2)-Ga(1)    | 122.86(19)  | C(20)-C(19)-C(18)    | 118.0(4)  | C(45')-C(44')-C(40') | 114.0(19) |
| C(30)-N(3)-C(35)    | 117.7(3)    | C(20)-C(19)-C(24)    | 119.7(4)  | C(45')-C(44')-C(46') | 111(2)    |
| C(30)-N(3)-C(35')   | 115.0(10)   | C(18)-C(19)-C(24)    | 122.3(3)  | C(40')-C(44')-C(46') | 114.0(17) |
| C(30)-N(3)-Ga(2)    | 123.5(2)    | C(21)-C(20)-C(19)    | 120.8(4)  | C(52)-C(47)-C(48)    | 122.0(3)  |
| C(35)-N(3)-Ga(2)    | 118.8(2)    | C(22)-C(21)-C(20)    | 120.4(4)  | C(52)-C(47)-N(4)     | 119.6(3)  |
| C(35')-N(3)-Ga(2)   | 116.6(9)    | C(21)-C(22)-C(23)    | 121.3(4)  | C(48)-C(47)-N(4)     | 118.4(3)  |
| C(32)-N(4)-C(47)    | 119.5(2)    | C(22)-C(23)-C(18)    | 117.8(4)  | C(49)-C(48)-C(47)    | 117.7(3)  |
| C(32)-N(4)-Ga(2)    | 123.7(2)    | C(22)-C(23)-C(27)    | 119.4(3)  | C(49)-C(48)-C(53)    | 120.2(3)  |
| C(47)-N(4)-Ga(2)    | 116.78(17)  | C(18)-C(23)-C(27)    | 122.7(3)  | C(47)-C(48)-C(53)    | 122.1(3)  |
| N(1)-C(1)-C(2)      | 123.4(3)    | C(19)-C(24)-C(25)    | 112.5(4)  | C(50)-C(49)-C(48)    | 121.2(3)  |
| N(1)-C(1)-C(4)      | 120.6(3)    | C(19)-C(24)-C(26)    | 111.9(4)  | C(51)-C(50)-C(49)    | 120.0(3)  |
| C(2)-C(1)-C(4)      | 116.0(3)    | C(25)-C(24)-C(26)    | 110.4(4)  | C(50)-C(51)-C(52)    | 121.6(4)  |
| C(3)-C(2)-C(1)      | 128.1(3)    | C(35')-C(36')-C(41') | 122.3(19) | C(51)-C(52)-C(47)    | 117.5(3)  |
| C(29)-C(27)-C(23)   | 109.7(3)    | C(37')-C(36')-C(41') | 122(2)    | C(51)-C(52)-C(56)    | 119.6(3)  |
| C(29)-C(27)-C(28)   | 110.7(4)    | C(38')-C(37')-C(36') | 121(2)    | C(47)-C(52)-C(56)    | 122.9(3)  |
| C(23)-C(27)-C(28)   | 112.7(4)    | C(39')-C(38')-C(37') | 121(2)    | C(48)-C(53)-C(55)    | 112.6(4)  |
| N(3)-C(30)-C(31)    | 124.3(3)    | C(40')-C(39')-C(38') | 121(2)    | C(48)-C(53)-C(54)    | 111.9(3)  |
| N(3)-C(30)-C(33)    | 119.1(3)    | C(39')-C(40')-C(35') | 117(2)    | C(55)-C(53)-C(54)    | 109.4(3)  |
| C(31)-C(30)-C(33)   | 116.6(3)    | C(39')-C(40')-C(44') | 115.9(17) | C(52)-C(56)-C(58)    | 111.3(3)  |
| C(32)-C(31)-C(30)   | 128.0(3)    | C(35')-C(40')-C(44') | 127.4(18) | C(52)-C(56)-C(57)    | 111.7(3)  |
| N(4)-C(32)-C(31)    | 123.0(3)    | C(43')-C(41')-C(42') | 108(3)    | C(58)-C(56)-C(57)    | 110.5(3)  |
| N(4)-C(32)-C(34)    | 119.8(3)    | C(31)-C(32)-C(34)    | 117.1(3)  |                      |           |
| N(2)-C(3)-C(2)      | 124.3(3)    | C(36)-C(35)-C(40)    | 122.7(4)  |                      |           |

**Table S4:** Bond lengths [Å] for **2**.

|             |            |             |           |
|-------------|------------|-------------|-----------|
| Br(3)-Ga(1) | 2.3986(11) | C(21)-C(22) | 1.379(14) |
| As(1)-Ga(2) | 2.2591(11) | C(22)-C(23) | 1.375(13) |
| As(1)-Ga(1) | 2.3580(11) | C(23)-C(27) | 1.519(12) |
| Ga(1)-N(2)  | 1.994(6)   | C(24)-C(26) | 1.516(11) |
| Ga(1)-N(1)  | 2.020(6)   | C(24)-C(25) | 1.537(12) |
| Ga(2)-N(3)  | 1.910(6)   | C(27)-C(28) | 1.538(12) |
| Ga(2)-N(4)  | 1.957(6)   | C(27)-C(29) | 1.545(12) |
| N(1)-C(1)   | 1.321(9)   | C(30)-C(31) | 1.399(10) |
| N(1)-C(6)   | 1.444(10)  | C(30)-C(33) | 1.502(11) |
| N(2)-C(3)   | 1.349(9)   | C(31)-C(32) | 1.382(11) |
| N(2)-C(18)  | 1.442(10)  | C(32)-C(34) | 1.508(10) |
| N(3)-C(30)  | 1.377(9)   | C(35)-C(40) | 1.400(10) |
| N(3)-C(35)  | 1.434(9)   | C(35)-C(36) | 1.404(10) |
| N(4)-C(32)  | 1.345(9)   | C(36)-C(37) | 1.377(11) |
| N(4)-C(47)  | 1.441(10)  | C(36)-C(41) | 1.512(10) |
| C(1)-C(2)   | 1.402(11)  | C(37)-C(38) | 1.380(12) |
| C(1)-C(4)   | 1.507(10)  | C(38)-C(39) | 1.388(12) |
| C(2)-C(3)   | 1.385(10)  | C(39)-C(40) | 1.385(11) |
| C(3)-C(5)   | 1.516(11)  | C(40)-C(44) | 1.526(10) |
| C(6)-C(7)   | 1.393(11)  | C(41)-C(42) | 1.535(11) |
| C(6)-C(11)  | 1.420(11)  | C(41)-C(43) | 1.542(12) |
| C(7)-C(8)   | 1.407(11)  | C(44)-C(45) | 1.503(13) |
| C(7)-C(12)  | 1.526(11)  | C(44)-C(46) | 1.542(11) |
| C(8)-C(9)   | 1.393(12)  | C(47)-C(52) | 1.409(11) |
| C(9)-C(10)  | 1.353(13)  | C(47)-C(48) | 1.418(11) |
| C(10)-C(11) | 1.400(11)  | C(48)-C(49) | 1.362(12) |
| C(11)-C(15) | 1.496(12)  | C(48)-C(53) | 1.531(11) |
| C(12)-C(14) | 1.533(11)  | C(49)-C(50) | 1.400(13) |
| C(12)-C(13) | 1.547(11)  | C(50)-C(51) | 1.365(12) |
| C(15)-C(17) | 1.536(12)  | C(51)-C(52) | 1.387(11) |
| C(15)-C(16) | 1.542(11)  | C(52)-C(56) | 1.521(11) |
| C(18)-C(23) | 1.402(12)  | C(53)-C(55) | 1.516(13) |
| C(18)-C(19) | 1.417(12)  | C(53)-C(54) | 1.552(12) |
| C(19)-C(20) | 1.380(12)  | C(56)-C(57) | 1.526(12) |
| C(19)-C(24) | 1.524(12)  | C(56)-C(58) | 1.547(11) |
| C(20)-C(21) | 1.380(13)  |             |           |

**Table S5:** Bond angles [°] for **2**.

|                   |            |                   |          |                   |          |
|-------------------|------------|-------------------|----------|-------------------|----------|
| Ga(2)-As(1)-Ga(1) | 113.37(4)  | C(10)-C(9)-C(8)   | 120.1(8) | C(40)-C(35)-C(36) | 121.5(7) |
| N(2)-Ga(1)-N(1)   | 94.4(2)    | C(9)-C(10)-C(11)  | 122.5(8) | C(40)-C(35)-N(3)  | 120.0(6) |
| N(2)-Ga(1)-As(1)  | 105.31(18) | C(10)-C(11)-C(6)  | 117.2(8) | C(36)-C(35)-N(3)  | 118.5(6) |
| N(1)-Ga(1)-As(1)  | 120.12(17) | C(10)-C(11)-C(15) | 120.7(7) | C(37)-C(36)-C(35) | 118.4(7) |
| N(2)-Ga(1)-Br(3)  | 103.96(18) | C(6)-C(11)-C(15)  | 122.1(7) | C(37)-C(36)-C(41) | 120.7(7) |
| N(1)-Ga(1)-Br(3)  | 101.29(17) | C(7)-C(12)-C(14)  | 110.6(7) | C(35)-C(36)-C(41) | 120.9(7) |
| As(1)-Ga(1)-Br(3) | 126.18(4)  | C(7)-C(12)-C(13)  | 112.2(7) | C(36)-C(37)-C(38) | 121.1(8) |
| N(3)-Ga(2)-N(4)   | 95.4(2)    | C(14)-C(12)-C(13) | 109.9(7) | C(37)-C(38)-C(39) | 120.0(8) |
| N(3)-Ga(2)-As(1)  | 153.88(17) | C(11)-C(15)-C(17) | 114.6(7) | C(40)-C(39)-C(38) | 120.8(8) |
| N(4)-Ga(2)-As(1)  | 110.32(19) | C(11)-C(15)-C(16) | 111.2(7) | C(39)-C(40)-C(35) | 118.2(7) |
| C(1)-N(1)-C(6)    | 119.2(6)   | C(17)-C(15)-C(16) | 109.4(7) | C(39)-C(40)-C(44) | 119.2(7) |
| C(1)-N(1)-Ga(1)   | 120.1(5)   | C(23)-C(18)-C(19) | 121.6(8) | C(35)-C(40)-C(44) | 122.5(7) |
| C(6)-N(1)-Ga(1)   | 120.6(4)   | C(23)-C(18)-N(2)  | 118.2(7) | C(36)-C(41)-C(42) | 114.6(7) |
| C(3)-N(2)-C(18)   | 116.8(6)   | C(19)-C(18)-N(2)  | 120.2(7) | C(36)-C(41)-C(43) | 109.6(6) |
| C(3)-N(2)-Ga(1)   | 119.1(5)   | C(20)-C(19)-C(18) | 117.4(8) | C(42)-C(41)-C(43) | 110.2(7) |
| C(18)-N(2)-Ga(1)  | 124.0(5)   | C(20)-C(19)-C(24) | 120.2(8) | C(45)-C(44)-C(40) | 112.1(7) |
| C(30)-N(3)-C(35)  | 116.6(6)   | C(18)-C(19)-C(24) | 122.3(7) | C(45)-C(44)-C(46) | 111.1(7) |
| C(30)-N(3)-Ga(2)  | 124.6(5)   | C(19)-C(20)-C(21) | 121.6(9) | C(40)-C(44)-C(46) | 110.4(7) |
| C(35)-N(3)-Ga(2)  | 118.8(4)   | C(22)-C(21)-C(20) | 119.5(9) | C(52)-C(47)-C(48) | 121.7(7) |
| C(32)-N(4)-C(47)  | 120.8(6)   | C(23)-C(22)-C(21) | 122.0(9) | C(52)-C(47)-N(4)  | 119.3(7) |
| C(32)-N(4)-Ga(2)  | 124.3(5)   | C(22)-C(23)-C(18) | 117.6(8) | C(48)-C(47)-N(4)  | 118.8(7) |
| C(47)-N(4)-Ga(2)  | 114.8(4)   | C(22)-C(23)-C(27) | 120.9(8) | C(49)-C(48)-C(47) | 117.4(8) |
| N(1)-C(1)-C(2)    | 124.0(6)   | C(18)-C(23)-C(27) | 121.4(8) | C(49)-C(48)-C(53) | 121.5(8) |
| N(1)-C(1)-C(4)    | 120.9(7)   | C(26)-C(24)-C(19) | 108.8(7) | C(47)-C(48)-C(53) | 121.1(7) |
| C(2)-C(1)-C(4)    | 115.1(6)   | C(26)-C(24)-C(25) | 109.8(7) | C(48)-C(49)-C(50) | 121.9(8) |
| C(3)-C(2)-C(1)    | 129.3(7)   | C(19)-C(24)-C(25) | 114.1(7) | C(51)-C(50)-C(49) | 119.8(8) |
| N(2)-C(3)-C(2)    | 123.9(7)   | C(23)-C(27)-C(28) | 110.8(7) | C(50)-C(51)-C(52) | 121.4(8) |
| N(2)-C(3)-C(5)    | 118.4(7)   | C(23)-C(27)-C(29) | 111.7(7) | C(51)-C(52)-C(47) | 117.7(7) |
| C(2)-C(3)-C(5)    | 117.6(6)   | C(28)-C(27)-C(29) | 110.5(7) | C(51)-C(52)-C(56) | 119.2(7) |
| C(7)-C(6)-C(11)   | 121.2(7)   | N(3)-C(30)-C(31)  | 122.6(7) | C(47)-C(52)-C(56) | 123.1(7) |
| C(7)-C(6)-N(1)    | 120.4(7)   | N(3)-C(30)-C(33)  | 118.7(7) | C(55)-C(53)-C(48) | 112.5(8) |
| C(11)-C(6)-N(1)   | 118.4(7)   | C(31)-C(30)-C(33) | 118.7(6) | C(55)-C(53)-C(54) | 108.5(8) |
| C(6)-C(7)-C(8)    | 118.8(8)   | C(32)-C(31)-C(30) | 128.6(7) | C(48)-C(53)-C(54) | 113.2(7) |
| C(6)-C(7)-C(12)   | 123.0(7)   | N(4)-C(32)-C(31)  | 123.4(7) | C(52)-C(56)-C(57) | 112.3(7) |
| C(8)-C(7)-C(12)   | 118.2(8)   | N(4)-C(32)-C(34)  | 119.3(7) | C(52)-C(56)-C(58) | 110.7(7) |
| C(9)-C(8)-C(7)    | 120.2(9)   | C(31)-C(32)-C(34) | 117.4(6) | C(57)-C(56)-C(58) | 110.2(7) |

### 3. Quantum chemical calculations

**Computational methods.** All quantum chemical calculations were employed with the ORCA quantum chemistry package (version 4.0).<sup>[1]</sup> Ground-state geometry optimizations were calculated with the PBE0 functional<sup>[2]</sup>, the def2-SVP basis set on all C and H atoms and the def2-TZVP basis set on As, Ga, Cl and N.<sup>[3]</sup> The atom-pairwise dispersion correction with Becke-Johnson damping scheme (D3BJ)<sup>[4]</sup> was used to account for dispersion interactions. The RIJCOSX approximation was utilized to accelerate the calculations in conjunction with the appropriate auxiliary basis sets (def2/J).<sup>[5]</sup> Natural bond orbital analysis was performed using the NBO 6.0 program.<sup>[6]</sup> Vibrational frequency calculations were conducted to determine whether the optimized geometries are local minima on the potential energy surface.

**Table S6.** Cartesian coordinates x,y,z [Å] for the optimized geometry of LGaAsGa(Cl)L (**1**).

|    |                   |                   |                  |
|----|-------------------|-------------------|------------------|
| As | 7.76956152802252  | 4.14403589256378  | 4.71206426349831 |
| Cl | 7.13242285937694  | 1.97799328690088  | 8.14356912286602 |
| Ga | 8.21985903811540  | 2.39601504086360  | 6.24112184522823 |
| Ga | 5.76029715117123  | 5.09443788044355  | 5.11328955094542 |
| N  | 10.13152977605119 | 2.40045293992808  | 6.84302280617115 |
| N  | 8.36700145453710  | 0.61132901414987  | 5.34025593354061 |
| N  | 4.66403834807384  | 6.04182803625429  | 6.39565173481765 |
| N  | 4.77000624512488  | 5.73776688027829  | 3.54689308067439 |
| C  | 10.77939298098008 | 1.26885412169341  | 7.06567249899594 |
| C  | 10.31209609933667 | 0.01423110488537  | 6.64929642078951 |
| C  | 9.27314598627922  | -0.27443198378767 | 5.75487857662932 |
| C  | 12.10353302552422 | 1.26911340191151  | 7.78039191150747 |
| H  | 12.57959286650453 | 2.25553809374207  | 7.78273136772665 |
| C  | 9.24127024973857  | -1.68249122821181 | 5.22355650706974 |
| H  | 9.23924668285414  | -1.69250009958281 | 4.12367262291189 |
| H  | 8.32623498799346  | -2.19975724178444 | 5.54389959551597 |
| H  | 10.10555168006016 | -2.25200940438018 | 5.58484333171242 |
| C  | 10.76322374915348 | 3.65508362729947  | 7.09315372725493 |
| C  | 11.34202084216256 | 4.33298383538135  | 5.99770929586557 |
| C  | 11.90026334885295 | 5.59326561351932  | 6.21782432268574 |
| H  | 12.34175555499545 | 6.13717400812744  | 5.38058789843696 |
| C  | 11.92462255605874 | 6.15479473281500  | 7.49059039957641 |
| H  | 12.37009444367086 | 7.13972763216169  | 7.64751136915970 |
| C  | 11.39776366202039 | 5.45113803429807  | 8.56542273087355 |
| H  | 11.44949258145044 | 5.88520800236031  | 9.56727667032874 |
| C  | 10.80392249010333 | 4.19593187593370  | 8.39301318570249 |
| C  | 11.47201406903626 | 3.65085848410506  | 4.64983363219599 |
| H  | 10.64727655423260 | 2.92641948222376  | 4.56829315653571 |
| C  | 11.36464326058175 | 4.58894900829426  | 3.45657517804446 |
| H  | 11.42074439010684 | 4.00741988611771  | 2.52272295967577 |
| H  | 12.18105362928860 | 5.32834509914268  | 3.42506561340488 |
| H  | 10.40665263280709 | 5.12790586832897  | 3.46855337923017 |

|   |                   |                   |                   |
|---|-------------------|-------------------|-------------------|
| C | 12.78217286740344 | 2.85868608269748  | 4.59481487888406  |
| H | 12.88774916824479 | 2.34972725450695  | 3.62368078752746  |
| H | 12.83483885528902 | 2.08881168994648  | 5.37738230852305  |
| H | 13.64490584248162 | 3.53135010067831  | 4.72768046138026  |
| C | 10.25817750466304 | 3.45575311552468  | 9.59914573944605  |
| H | 9.92128458633637  | 2.46588382789187  | 9.25977848092391  |
| C | 9.03543562183803  | 4.15981964604010  | 10.17619441771543 |
| H | 8.25371206354265  | 4.28271078866479  | 9.41799424239385  |
| H | 9.30113123044603  | 5.15494706417075  | 10.56967788936027 |
| H | 8.60468915307899  | 3.57263099889828  | 11.00212085729268 |
| C | 11.32456282037282 | 3.25969314656750  | 10.67863340877830 |
| H | 12.22872572549166 | 2.77460808264841  | 10.28412729977694 |
| H | 10.93032123623055 | 2.63581452025108  | 11.49576243370032 |
| H | 11.63441251360367 | 4.21992186972225  | 11.12101871167568 |
| C | 7.47745789374965  | 0.19220919582064  | 4.29600829184161  |
| C | 7.77342560721624  | 0.53346449745049  | 2.95862808721860  |
| C | 6.99259997591054  | -0.01863769566710 | 1.93780604887287  |
| H | 7.23060410419287  | 0.22263625690781  | 0.89999207382090  |
| C | 5.93632408122395  | -0.87584793921686 | 2.21762477968831  |
| H | 5.35068651782185  | -1.31653698517412 | 1.40764282832874  |
| C | 5.61527498854216  | -1.15185895163273 | 3.54016308968218  |
| H | 4.76206576053897  | -1.79633409615047 | 3.76432746414855  |
| C | 6.36276361150180  | -0.62258733332806 | 4.59608475651132  |
| C | 8.93464472907477  | 1.43133125050234  | 2.58205431719517  |
| H | 9.23084936560114  | 1.96930397806227  | 3.49279556212462  |
| C | 8.52120266469875  | 2.48185919850292  | 1.55708592725999  |
| H | 8.21867366650348  | 2.03404739816245  | 0.59789508641396  |
| H | 9.35652372596984  | 3.16777306736824  | 1.34941707905845  |
| H | 7.68692988548430  | 3.08350209041571  | 1.94048577977115  |
| C | 10.14339775716067 | 0.62490182215212  | 2.10753337101856  |
| H | 9.88394437183128  | -0.01028835171291 | 1.24519298592556  |
| H | 10.53511491961889 | -0.02851768621317 | 2.90075035931726  |
| C | 5.90754405575901  | -0.89433580778817 | 6.01707231018448  |
| H | 6.71224002901424  | -0.59518926430765 | 6.70449032800786  |
| C | 5.57127561918618  | -2.36045387572776 | 6.28311972336097  |
| H | 4.72592254172885  | -2.70722280645133 | 5.66907299414132  |
| H | 5.27906021392140  | -2.49855675334849 | 7.33589231974110  |
| H | 6.42354336573933  | -3.02664963414101 | 6.07744495273558  |
| C | 4.70691931859359  | -0.00043201934659 | 6.31546870201705  |
| H | 4.95256425827651  | 1.05014646661893  | 6.12089181101248  |
| H | 4.39658447294562  | -0.08511410885240 | 7.36812636894908  |
| H | 3.85156308167302  | -0.27117325958575 | 5.67588889110173  |
| C | 3.67772385595046  | 6.88315271946271  | 6.08677696367565  |
| C | 3.70853379460153  | 6.53495396269013  | 3.59351149943136  |
| C | 5.05490914628015  | 5.87929097290769  | 7.76239257935809  |
| C | 6.19780475666358  | 6.55361184669385  | 8.22959764840947  |
| C | 6.56062039957804  | 6.36475862029105  | 9.56677922331721  |
| H | 7.44233784973853  | 6.87551895863512  | 9.95817249985725  |
| C | 5.84039474572021  | 5.51135225206529  | 10.39264799942637 |
| H | 6.16616470044722  | 5.34414832081881  | 11.42204141706237 |
| C | 4.72861988891022  | 4.83456366448535  | 9.90112469174300  |
| H | 4.18962864885974  | 4.14495366384764  | 10.55331352794146 |
| C | 4.30880775104067  | 5.00883698811488  | 8.58199445348911  |

|   |                   |                   |                   |
|---|-------------------|-------------------|-------------------|
| C | 7.02130759993051  | 7.46101660937074  | 7.33405030560351  |
| H | 6.73416591634337  | 7.24511096872034  | 6.29180903975536  |
| C | 8.51514761271009  | 7.18133671288893  | 7.44001491021648  |
| H | 8.73866017017604  | 6.12223387376694  | 7.24792399226439  |
| H | 8.91762338334039  | 7.45559081870609  | 8.42753506596487  |
| H | 9.06520227617853  | 7.76979765087405  | 6.69155157227215  |
| C | 6.71146558721612  | 8.93674750009508  | 7.58329714681765  |
| H | 7.32516301198121  | 9.57387482217030  | 6.92969692471549  |
| H | 6.93208805908228  | 9.21712461652386  | 8.62600963856131  |
| H | 5.65658389112813  | 9.17791964434041  | 7.38274546430162  |
| C | 3.14097391450211  | 4.22635435362609  | 8.01137334441497  |
| H | 2.63402445091666  | 4.86029734654239  | 7.26696536603789  |
| C | 3.66397546243832  | 2.99239685256185  | 7.28204185785038  |
| H | 4.39626692521788  | 3.24951017354388  | 6.49910037690277  |
| H | 2.84639651202519  | 2.42732925973110  | 6.80806419255273  |
| H | 4.19240598124146  | 2.33101376062066  | 7.98181229183824  |
| C | 2.09800940442495  | 3.82281151765907  | 9.04694112066531  |
| H | 1.24882330925024  | 3.32950616348538  | 8.54939873885522  |
| H | 1.71298991160316  | 4.68936860336101  | 9.60586549814929  |
| H | 2.50320020700656  | 3.10300281502215  | 9.77496379826265  |
| C | 5.18676452629002  | 5.21031594520439  | 2.28390936486782  |
| C | 6.25110943639086  | 5.83584510680412  | 1.60533655618477  |
| C | 6.61934594401501  | 5.32231348681526  | 0.35912392298414  |
| H | 7.43806222187183  | 5.78877216940131  | -0.19016246776443 |
| C | 4.97562946717040  | 3.57145242849547  | 0.53815825047730  |
| C | 4.55179565959091  | 4.06034137603360  | 1.77670158236627  |
| C | 7.00976263029707  | 6.99617765450938  | 2.22537893453448  |
| H | 6.96959406271520  | 6.84359640142960  | 3.31721274655201  |
| C | 6.38586485893323  | 8.36099366733214  | 1.93224071796319  |
| H | 6.37077277238548  | 8.55944619689571  | 0.84868657835997  |
| H | 6.97411082041718  | 9.15775948690814  | 2.41259506648807  |
| H | 5.35700533536710  | 8.44159383359261  | 2.31024841060297  |
| C | 8.48637165372801  | 6.99643929793806  | 1.84564448318650  |
| H | 8.64485483741873  | 7.29969114623374  | 0.79771893679971  |
| H | 8.93157672401420  | 6.00327672634182  | 1.99720238480290  |
| H | 9.03662704500053  | 7.71088498531873  | 2.47460231578768  |
| C | 3.49410978709067  | 3.32349457588760  | 2.57896490355749  |
| H | 3.04974441252491  | 4.04008131315234  | 3.28760344736711  |
| C | 2.35425376766821  | 2.77954150082331  | 1.72343202318942  |
| H | 1.87792250800956  | 3.56938790322892  | 1.12157916889707  |
| H | 1.58294296694688  | 2.32683574951109  | 2.36495909372751  |
| H | 2.69736983490417  | 1.99360851780935  | 1.03341594924174  |
| C | 4.13868009213718  | 2.20920414929771  | 3.40340599517761  |
| H | 4.58983546667269  | 1.44625922106223  | 2.75342360496571  |
| H | 3.39638118585000  | 1.71303517030642  | 4.04793686621097  |
| H | 4.95413012452659  | 2.58942394077669  | 4.03827744391236  |
| H | 10.94122153655249 | -0.82933891161107 | 6.92967848863507  |
| C | 3.21805158867784  | 7.09584836807763  | 4.78237843342157  |
| C | 3.00848583714719  | 7.65218443177700  | 7.18845069681162  |
| H | 3.75349346964018  | 8.19442062345636  | 7.78838100209591  |
| H | 2.48634354553542  | 6.97870115457493  | 7.88447856022124  |
| H | 2.28530917793197  | 8.36711513528007  | 6.77826252807394  |
| C | 2.97055462081045  | 6.84821328754206  | 2.32374851574689  |



|   |                   |                  |                   |
|---|-------------------|------------------|-------------------|
| H | 3.65909904193643  | 7.16259121781058 | 1.52791726877424  |
| H | 2.21817017443715  | 7.62833201074202 | 2.48854338882552  |
| H | 2.46214358568291  | 5.94518859693741 | 1.95158956518478  |
| H | 2.37297129797162  | 7.77362360508816 | 4.67850925542040  |
| H | 10.95583599635475 | 1.30003839968208 | 1.79576144690875  |
| H | 11.94422645421894 | 0.96532254488405 | 8.82713381051716  |
| H | 12.78532287502238 | 0.53920673574896 | 7.32560919867978  |
| C | 5.98755154149622  | 4.20467494864691 | -0.17477130734474 |
| H | 6.31570392133973  | 3.80056571096985 | -1.13540373437015 |
| H | 4.51245357203679  | 2.67173638815540 | 0.12940055584467  |

**Figure S10.** Calculated structure, HOMO and LUMO of LGaAsGa(Cl)L (1).

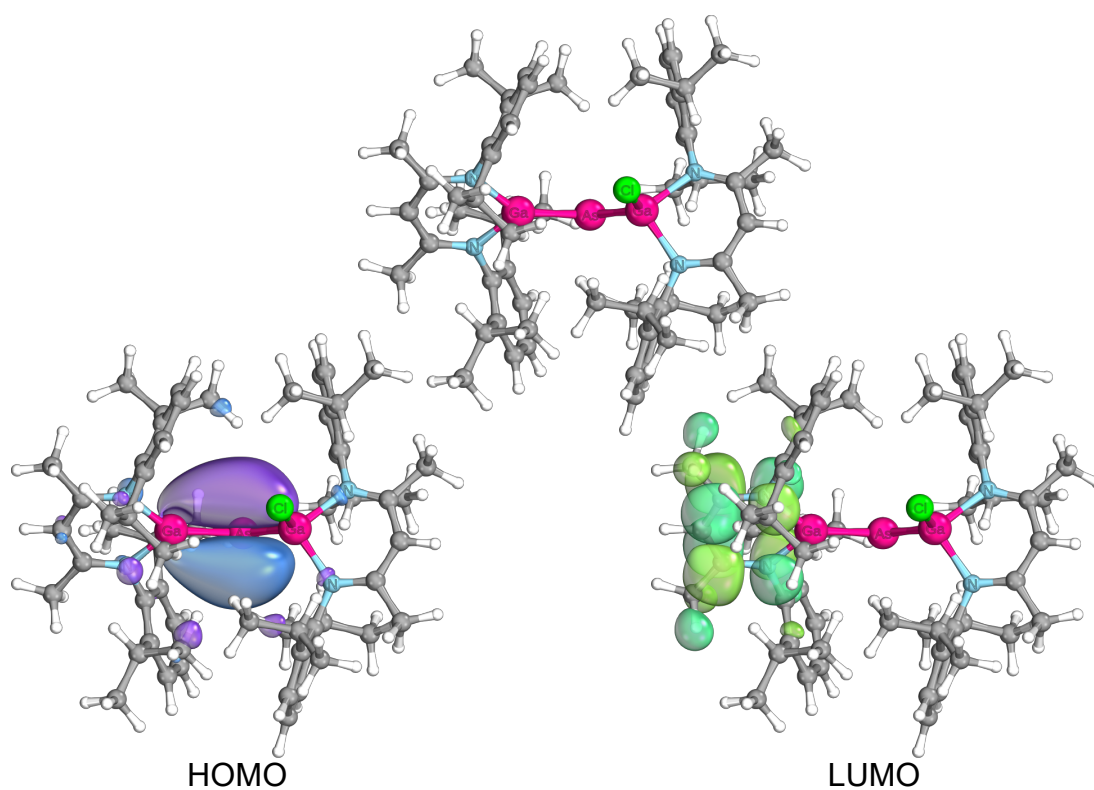

**Table S7.** NPA atomic charges ( $q$ ,  $e$ ), occupation numbers (ON,  $|e|$ ) of the bonds according to NBO, Mayer bond orders (MBO), bond polarization (P) and bond orbital character (OC) for the central Ga(2)-As-Ga(1)-Cl motive in LGaAsGa(Cl)L (**1**).

| X-Y            | $q(X,Y)$    | ON                                  | MBO  | P(X,Y)                                      | OC(X-Y)                                                             |
|----------------|-------------|-------------------------------------|------|---------------------------------------------|---------------------------------------------------------------------|
| As-Ga(1)       | -1.05, 1.38 | 1.91                                | 1.09 | 70%, 30%                                    | 20% s, 79% p – 40% s, 59% p                                         |
| As-Ga(2)       | -1.05, 1.34 | 1.89 ( $\sigma$ )<br>1.88 ( $\pi$ ) | 1.70 | 64%, 36% ( $\sigma$ )<br>86%, 14% ( $\pi$ ) | 14% s, 85% p – 54% s, 46% p ( $\sigma$ )<br>99% p – 99% p ( $\pi$ ) |
| Ga(1)-Cl       | 1.38, -0.55 | 1.97                                | 0.87 | 85%, 15%                                    | 36% s, 64% p – 22% s, 77% p                                         |
| As (lone pair) | -1.05       | 1.83                                |      |                                             | 65% s, 35% p                                                        |

### *Supplementary References*

- [1] F. Neese, The ORCA program system. *Wiley Interdisciplinary Reviews: Computational Molecular Science* 2012, **2**, 73.
- [2] J. P. Perdew, M. Ernzerhof and K. Burke, *J. Chem. Phys.* 1996, **105**, 9982-9985.
- [3] F. Weigend and R. Ahlrichs, *Phys. Chem. Phys.* 2005, **7**, 3297.
- [4] S. Grimme, S. Ehrlich and L. Goerigk, *J. Comp. Chem.* 2011, **32**, 1456.
- [5] F. Weigend, *Phys. Chem. Chem. Phys.* 2006, **8**, 1057.
- [6] NBO 6.0: E. D. Glendening, J. K. Badenhoop, A. E. Reed, J. E. Carpenter, J. A. Bohmann, C. M. Morales, C. R. Landis and F. Weinhold (Theoretical Chemistry Institute, University of Wisconsin, Madison, WI, 2013); <http://nbo6.chem.wisc.edu/>.
